# Supplementary material
Source: Preprints.org preprint supplement (doi:10.20944/preprints202109.0439.v1)
Supplement: Supplementary file 1 [file supplementary]

## Sheet: Summary 
	Generalized One Health Framework: TOOLKIT
	Description There are 10 tabs (excluding this page) in this document that summarize a list of highlighted resources that localities can consider to assist in the development and strengthening of One Health capacity around zoonotic diseases. Each tab contains a table with resources listed corresponding to a step and activity in the Generalized One Health Framework (GOHF) (Figure 1). For example, S…
	Tab BREAKDOWN 1. Pre-planning resources intended to generate and establish One Health support, and prioritize zoonotic diseases. 2a and 2b. Assessment resources intended to determine stregnths as well as needs or gaps between current and desired conditions. 3. Planning resources intended to assist with development of goals and actionable activities to meet targeted goals. 4. Implementation resour…

## Sheet: 1 - Engagement
	TABLE 1 - Engagement Resources
	Column descriptions: GOHF Activity: Corresponds to each activity outlined in the Generalized One Health Framework (GOHF), under Pre-planning (Step 1; Figure 1). Resource: An available document, website or tool that may assist in developing capacity to conduct the GOHF activity under which it falls. Type: A categorization of the type of resource, where EgD = Example document, such as a published s…
	#	GOHF Activity	Resource	Resource Description	Type	Citations	Online Links
	1.1	Establish One Health interest	Taking a Multisectoral, One Health Approach: A Tripartite Guide to Addressing Zoonotic Diseases in Countries (TZG)	Jointly developed by Food and Agriculture Organization of the United Nations (FAO), the World Organisation for Animal Health (OIE), and the World Health Organization (WHO), this zoonotic disease-specific guidance document is intended to provide operational guidance, tools and examples for the implementation of a multisectoral, One Health approach at the country level. Section 1.2 specifically dis…	G/F	WHO, FAO, and OIE. Taking a Multisectoral, One Health Approach: A Tripartite Guide to Addressing Zoonotic Diseases in Countries. 2019: World Health Organization (WHO), Food and Agriculture Organization of the United Nations (FAO) and the World Organisation for Animal Health (OIE).	FAO	OIE	WHO
	1.2		One Health: Operational Frameworks for Strengthening Human, Animal and Environmental Public Health Systems at their Interface	This operational framework and guidance document discusses the need to address diseases with pandemic potential using a multisectoral, One Health approach and provides guidance to operationalize the One Health approach. Chapter 2 provides a financial argument for the economic value of investing in One Health at the global, national and regional levels. It also includes examples of value added by …	G/F	Berthe, F.C.J., et al., Operational framework for strengthening human, animal and environmental public health systems at their interface. 2018, World Bank Group.	Berthe et al.
	1.3	Identify and engage stakeholders	Stakeholders and One Health	This published scientific manuscript outlines potential roles of stakeholders in generating multisectoral, One Health collaborations, including international organizations, regional networks, government sectors, universities, non-governmental organizations and communities.	G/F	Mazet, J.A.K., M.M. Uhart, and J.D. Keyyu, Stakeholders in One Health. Revue scientifique et technique, 2014. 33(2): p. 443-452.	N/A
	1.4		Taking a Multisectoral, One Health Approach: A Tripartite Guide to Addressing Zoonotic Diseases in Countries (TZG)	[See 1.1 for general description of the TZG] Sections 1.4, 3.2.4 and 4.2 discuss why stakeholders are important and how appropriate stakeholders can be identified through stakeholder analysis.	G/F	WHO, FAO, and OIE. Taking a Multisectoral, One Health Approach: A Tripartite Guide to Addressing Zoonotic Diseases in Countries. 2019: World Health Organization, Food and Agriculture Organization of the United Nations and the World Organisation for Animal Health.	FAO	OIE	WHO
	1.5		One Health Systems Mapping and Analysis Resource Toolkit (OH SMART)	The OH SMART uses an interactive, multisectoral, One Health approach to map the system of communication and coordination across a system (or network), with the goal of improving One Health collaboration across the system being analyzed. The process involves six steps, the first of which uses policy field analysis to identify stakeholders.	T/TK	UMN. One Health Systems Mapping and Analysis Resource Toolkit (OH-SMART). 2019; University of Minnesota College of Veterinary Medicine.	UMN OH-SMART
	1.6	Prioritize zoonotic diseases	One Health Zoonotic Disease Prioritization Process (OHZDP)	Developed by the CDC, the OHZDP process uses a multisectoral, One Health approach to prioritize zoonotic diseases of greatest concern and develop next steps and action plans to address the priority zoonotic diseases. The OHZDP process involves collaboration between all One Health sectors, including human/public health, animal health, environment, and other relevant sectors.	T/TK	Rist, C.L., C.S. Arriola, and C. Rubin, Prioritizing zoonoses: a proposed One Health tool for collaborative decision-making. PLoS ONE, 2014; U.S. CDC. 9(10): p. e109986. Salyer, S.J., et al., Prioritizing zoonoses for global health capacity building: themes from One Health Zoonotic Disease Workshops in 7 countries, 2014-2016. Emerging Infectious Diseases, 2017. 23(13): p. S55-S64. CDC. One Health…	OHZDP
	1.7		ECDC tool for the prioritisation of infectious diseases threats	Developed by the European Center for Disease Prevention and Control, this self-assessment tool uses a quantitative methodology based on multi-criteria decision analysis to rank infectious disease threats in a transparent and reproducible manner. The tool was designed for single-sector use but is adaptable.	T/TK	ECDC. ECDC tool for the prioritisation of infectious disease threats. 2017; European Centre for Disease Prevention and Control.	ECDC Prioritisation Tool
	1.8	Establish sustained governmental support for One Health	Taking a Multisectoral, One Health Approach: A Tripartite Guide to Addressing Zoonotic Diseases in Countries	[See 1.1 for general description of the TZG] Section 3.3 addresses the development of multisectoral, One Health coordinating mechanisms (MCMs) as a means of developing sustainable coordination.	G/F	WHO, FAO, and OIE. Taking a Multisectoral, One Health Approach: A Tripartite Guide to Addressing Zoonotic Diseases in Countries. 2019: World Health Organization, Food and Agriculture Organization of the United Nations and the World Organisation for Animal Health.	FAO	OIE	WHO
	1.9		Leadership, governance and partnerships are essential One Health competencies	This published scientific manuscript describes the leadership, management and governance competencies likely to lead to sustainable One Health programs.	G/F	Stephen, C. and B. Stemshorn, Leadership, governance and partnerships are essential One Health competencies. One Health, 2016. 2: p. 161-163.	N/A
	1.1		Cost Effectiveness Analysis	This CDC website describes cost-effectiveness analysis, its application, and resources for its use.	G/F	CDC. Cost-Effectiveness Analysis (CEA). 2019; U.S. Centers for Disease Control and Prevention.	CDC CEA

## Sheet: 2(a) - Assessment (General)
	TABLE 2(a) - General Assessment Resources
	Column descriptions: GOHF Activity: Corresponds to each activity outlined in the Generalized One Health Framework (GOHF), under Assessment (Step 2; Figure 1). Resource: An available document, website or tool that may assist in developing capacity to conduct the GOHF activity. Resource Description: A short overview of the resource. Type: A categorization of the type of resource, where EgD = Exampl…
	#	GOHF Activity	Resource	Resource Description	Type	Citations	Online Links
	2.1a	Map infrastructure	One Health Systems Mapping and Analysis Resource Toolkit (OH SMART)	[See Table 1, 1.5 for general description of the OH SMART] The OH SMART process involves six steps; the third step involves defining the system through process mapping.	T/TK	UMN. One Health Systems Mapping and Analysis Resource Toolkit (OH-SMART). 2019; University of Minnesota College of Veterinary Medicine.	OH SMART
	2.2a	Conduct gap analysis	Joint External Evaluation (JEE)	As part of WHO’s International Health Regulations, the JEE is a voluntary, collaborative tool to assess country capacity to prevent, detect and respond to public health threats across multiple One Health sectors. JEEs are conducted jointly by in-country and external teams.	T/TK	WHO. Joint External Evaluation Tool. World Health Organization. 2018.	WHO JEE
	2.3a		OIE Performance of Veterinary Services (PVS) Pathway	The PVS Pathway is an independent, externally led, sector-specific evaluation of a country’s veterinary services and animal health systems. It is comprised of evaluation, gap analysis, capacity building, and follow-up missions.	G&T	OIE. Veterinary Services, in Terrestrial Animal Health Code. World Organisation for Animal Health. 2018. OIE. Evaluation of Veterinary Services, in Terrestrial Animal Health Code. World Organisation for Animal Health. 2018. OIE. OIE PVS Pathway. World Organisation for Animal Health. 2019.	OIE PVS
	2.4a		IHR-PVS National Bridging Workshops (NBWs)	For countries that have completed both the JEE and PVS Pathway (see 2.2a and 2.3a above), NBWs are three-day events facilitated by WHO and OIE and provide opportunity for human and animal health sectors to review current gaps in collaboration and develop a joint road map for future activities pertaining to zoonoses at the human-animal interface.	T/TK	WHO and OIE. Fact Sheet IHR-PVS National Bridging Workshop. World Health Organization and World Organisation for Animal Health. 2019. WHO and OIE. Facilitator Manual National IHR and PVS Pathway Bridging Workshop. World Health Organization and World Organisation for Animal Health. 2019. WHO and OIE. Participant Handbook National IHR and PVS Pathway Bridging Workshop. World Health Organization and…	PVS Fact Sheet	PVS Workshop
	2.5a		Surveillance and Information Sharing Operational Tool	The Surveillance and Information Sharing Operational Tool is compilation of exisiting surveillance and One Health capacity building tools that have been scored, indexed, and presented in a logicalframework with an Excel-based tool. The tool is intended for country-level use to help guide One Health partners in developing coordinated surveillance for threats arising at the human-animal-environment…	T/TK	In pilot stage; available soon	Not available online
	2.6a		WHO Laboratory Assessment Tool (WHO LAT)	The LAT is focused specifically on building laboratory capacity in the public health sector. Through two questionnaires, the tool is intended to assess both individual laboratory facilities and the overall national laboratory system within a country.	T/TK	WHO. Laboratory Assessment Tool. World Health Organization. 2012.	WHO LAT
	2.7a		FAO Laboratory Mapping Tool (FAO LMT)	The FAO LMT is focused specifically on building laboratory capacity in the veterinary or animal health sector. This spreadsheet-based tool assesses individual laboratory functionality in a systematic and semi-quantitative manner. Currently, a core module and a safety module which additionally assesses biosafety and security risks, are available.	T/TK	FAO. Sharing FAO tools for Veterinary Laboratory assessment. Food and Agriculture Organization of the United Nations. 2016.	FAO Lab Mapping Tool
	2.8a		FAO-Surveillance Evaluation Tool (FAO-SET)	The FAO-SET is focused specifically on buidling surveillance capacity in the veterinary or animal health sector, but may be adaptable to use in other sectors. Comprised of the OASIS toolkit (Outil d’Analyse des Systemes de Surveillance) and components of the FAO Epidemiology and Laboratory Mapping tools. The tool evaluates the capacity of animal disease (including zoonotic disease) surveillance s…	T/TK	Hendrikx, P., et al., OASIS: an assessment tool of epidemiological surveillance systems in animal health and food safety. Epidemiology and Infection, 2011(1469-4409 (Electronic)). FAO. Evaluation for Action- FAO’s surveillance evaluation tool (SET) is shaping projects in Africa. Food and Agriculture Organization of the United Nations. 2018.	FAO-SET
	2.9a		One Health Surveillance Readiness and Requirements Tool (OHSRRT)	The OHSRRT is focused specifically on building surveillance capacity using a One Health approach. The tool is designed to assess country readiness to develop a One Health surveillance system, and is a paper-based tool that scores readiness by assessing infrastructure and capacity among and between One Health sectors.	T/TK	Johns Hopkins Applied Physics Laboratory. One Health Surveillance Readiness and Requirements Tool (OHSRRT). 2019.	Not available online
	2.10a	Complete an economic assessment	PVS Gap Analysis	[See 2.3a for general description of the PVS Pathway] A tool that is part of the PVS Pathway cycle, the PVS Gap Analysis is implemented by OIE experts through an in-country mission that identifies priorities and establishes a five-year plan that includes cost estimations.	T/TK	OIE. Support to OIE Members. World Organisation for Animal Health. 2019.	OIE PVS
	2.11a		A One Health Framework for Estimating the Economic Costs of Zoonotic Diseases on Society	A published scientific manuscript that presents a modified risk analysis framework that integrates multisectoral, One Health models with a toolkit of methods and approaches for each proposed step.	G/F	Narrod, C., J. Zinsstag, and M. Tiongco, A One Health framework for estimating the economic costs of zoonotic diseases on society. EcoHealth, 2012. 9(2): p. 150-162.	N/A
	2.12a		WHO-CHOICE	A set of resources and tools for measuring the efficiency of a program or intervention relative to investment. The tool is based on generalized cost-effectiveness analysis.	G&T	WHO. Cost effectiveness and strategic planning (WHO-CHOICE). World Health Organization. 2019.	WHO-CHOICE
	2.13a		POLARIS Economic Evaluation	This CDC website provides an overview of economic evaluation for public health professionals, describes different types of economic evaluations and their purpose, and provides tools and courses for conducting economic evaluations.	G/F	CDC. Economic Evaluation Overview. 2019; U.S. Centers for Disease Control and Prevention.	CDC Economic Evaluation
	2.14a		CDC SurvCost	The CDC SurvCost tool is focused specifically on building surveillance capacity in the public health sector, but may be of use to other sectots. It is a spreadsheet-based tool that estimates the cost of Integrated Disease Surveillance and Response (IDSR) systems at all country levels.	T/TK	CDC. Integrated Disease Surveilllance and Response (IDSR). 2019; U.S. Centers for Disease Control and Prevention.	CDC IDSR

## Sheet: 2(b) - Assessment (ZD)
	TABLE 2(b) - Zoonotic Disease-Specific Assessment Resources
	Column descriptions: GOHF Activity: Corresponds to each activity outlined in the Generalized One Health Framework (GOHF), under Assessment (Step 2; Figure 1). Resource: An available document, website or tool that may assist in developing capacity to conduct the GOHF activity. Resource Description: A short overview of the resource. Type: A categorization of the type of resource, where EgD = Exampl…
	#	GOHF Activity	Zoonotic Disease	Resource	Resource Description	Type	Citations	Online Links
	2.1b	Map infrastructure	Multiple	One Health Systems Mapping and Analysis Resource Toolkit (OH SMART)	[See Table 1, 1.5 for general description of the OH SMART] The OH SMART process involves six steps; the third step involves defining the system through process mapping that is applicable to any zoonotic disease-specific program.	T/TK	UMN. One Health Systems Mapping and Analysis Resource Toolkit (OH-SMART). 2019; University of Minnesota College of Veterinary Medicine.	UMN OH-SMART
	2.2b	Establish baseline	Multiple	Field Epidemiology	This textbook describes the approach, tasks and actions needed for successful field investigations under a multitude of settings and can therefore be used as a reference guide for establishing baseline zoonotic disease burdens.	G/F	Gregg, M.B., Field Epidemiology. 2008: Oxford University Press, USA.	N/A
	2.3b		Multiple	Zoonotic Disease Programs for Enhancing Global Health Security	This published scientific manuscript describes the importance of assessing the burden of zoonotic disease and provides example metrics.	G/F	Belay, E.D., et al., Zoonotic disease programs for enhancing global health security. Emerging Infectious Diseases 2017. 23(Suppl 1): p. S65.	N/A
	2.4b	Conduct gap analysis	Anthrax	Framework for enhancing anthrax prevention and control	This framework provides best practices and guidance for control of endemic anthrax. Phase I of this document is a paper-based assessment that can be used to evaluate country-level capacity to prevent an anthrax outbreak.	G&T	CDC. Framework for Enhancing Anthrax Prevention & Control. 2016, U.S. Centers for Disease Control and Prevention. Vieira, A.R., et al., Enhancing Surveillance and Diagnostics in Anthrax-Endemic Countries. Emerging Infectious Diseases, 2017. 23(13): p. S147-S153.	CDC Anthrax Framework
	2.5b		Brucellosis	Staged Tool for the Elimination of Brucellosis in Livestock (STEB)	A staged self-assessment tool that countries can use to evaluate existing capacity to prevent, control and eliminate brucellosis in livestock. The STEB evaluates country capacity on a scale of 1-5, and is a complementary resource to the guidance document, a Stepwise Approach for the Progressive Control of Brucellosis in Livestock and Humans (see Table 3b, 3.4b), which are meant to help countries …	T/TK	In development; please contact bspb@cdc.gov and onehealth@cdc.gov for more information	N/A
	2.6b		Rabies	Stepwise Approach to Rabies Elimination (SARE)	Initially developed by FAO and GARC in 2012 and updated with additional input from CDC, WHO and OIE in 2015, this tool guides users through a stepwise (0-5) evaluation of a canine rabies control program. The tool provides links to numerous rabies control resources, and is intended to be used with the paired guidance document, Canine Rabies Blueprint (See Table 3b, 3.6b).	G&T	GARC. Canine Rabies Blueprint- The Stepwise Approach to Planning and Evaluation. 2017; Global Alliance for Rabies Control.	GARC
	2.7b		Zoonotic Influenza	Tool for Influenza Pandemic Risk Assessment (TIPRA)	The TIPRA focuses specifically on building preparedness capacity. This WHO risk analysis tool evaluates the pandemic potential of influenza viruses. The TIPRA can identify information gaps and therefore assist with planning research and surveillance activities.	T/TK	WHO. Tool for Influenza Pandemic Risk Assessment (TIPRA). World Health Organization. 2016.	WHO TIPRA
	2.8b		Zoonotic Influenza	Influenza risk assessment tool (IRAT)	Similar to the TIPRA (2.7b), the IRAT is a preparedness and risk analysis tool that assess the risk of pandemics posed by Influenza A viruses not currently circulating in people. The IRAT can serve as a gap analytical tool by identifying missing information among 10 criteria.	T/TK	CDC. Influenza RIsk Assessment Tool (IRAT) 2019; U.S. Centers for Disease Control and Prevention.	CDC IRAT
	2.9b	Complete an economic assessment	Rabies	Global Dog Rabies Elimination Pathway (GDREP)	The GDREP focuses specifically on building prevention and control capacity, and is an interactive tool to estimate the time and cost associated with dog vaccination campaigns necessary to achieve rabies elimination. An update in 2018 included the ability to estimate cost and future demand for human rabies vaccine and surveillance activities.	T/TK	WHO. Tool for Influenza Pandemic Risk Assessment (TIPRA). World Health Organization. 2016. WHO. National Action Plan for Health Security (NAPHS). World Health Organization. 2019.	WHO TIPRA	WHO NAPHS
	2.10b		Rabies	RabiesEcon	The RabiesEcon is a spreadsheet tool that uses a deterministic Susceptible-Exposed-Infected-Recovered (SEIR) mathematical model to evaluate potential impacts and the cost-effectiveness of dog rabies programs. The model was updated at the end of 2019.	T/TK	Borse, R.H., et al., Cost-effectiveness of dog rabies vaccination programs in East Africa. PLoS Neglected Tropical Diseases, 2018. 12(5): p. e0006490. Jeon, S., et al., Determining the post-elimination level of vaccination needed to prevent re-establishment of dog rabies. PLoS Neglected Tropical Diseases, 2019. 13(12).	N/A

## Sheet: 3(a) - Planning (General)
	Table 3(a) - General Planning Resources
	Column descriptions: GOHF Activity: Corresponds to each activity outlined in the Generalized One Health Framework (GOHF), under Planning (Step 3; Figure 1). Resource: An available document, website or tool that may assist in developing capacity to conduct the GOHF activity. Resource Description: A short overview of the resource. Type: A categorization of the type of resource, where EgD = Example …
	#	GOHF Activity	Resource	Resource Description	Type	Citations	Online Links
	3.1a	Develop a multisectoral, One Health strategic plan	National Action Plans for Health Security (NAPHS)	The NAPHS is five-year multisectoral monitoring and evaluation plan intended to guide country-level activities, thereby accelerating compliance with WHO’s International Health Regulations. Includes Annual Reporting (Table 5a, 5.2a), Simulation Exercises (Table 5a, 5.7a), the JEE (Table 2a, 2.2a) and After-Action reviews (Table 5a, 5.6a). The NAPHS is divided into three steps (Inception, Developme…	G & T	WHO. National Action Plan for Health Security (NAPHS). 2019.	WHO NAPHS
	3.2a		National Biodiversity Strategy and Action Plan	As part of the United Nations Convention on Biological Diversity, this guidance document provides a process for addressing threats to biodiversity. Importantly, the national biodiversity strategy requires countries incorporate elements of the plan into all sectors whose activities impact biodiversity (either positively or negatively).	G/F	CBD. National Biodiversity Strategies and Action Plans (NBSAPs). 2019; Convention on Biological Diversity.	CBD
	3.3a	Develop plans for priority zoonotic diseases	Terrestrial Animal Health Code	This is a reference document for setting standards for terrestrial animal health and veterinary public health that includes trade, import and export, notification and reporting, and prevention and control guidelines.	G/F	OIE. Terrestrial Animal Health Code. World Organisation for Animal Health. 2019.	OIE Terrestrial Code
	3.4a		Aquatic Animal Health Code	This is a reference document for setting standards for aquatic animal welfare that includes trade, import and export, notification and reporting, and prevention and control guidelines.	G/F	OIE. Aquatic Animal Health Code. World Organisation for Animal Health. 2019.	OIE Aquatic Code
	3.5a		Taking a Multisectoral, One Health Approach: A Tripartite Guide to Addressing Zoonotic Diseases in Countries (TZG)	[See 1.1 for general description of the TZG] Chapter 5 deals with how countries can implement One Health in relation to specific technical activities, namely: preparedness, surveillance, joint outbreak response, risk assessment, communication, and workforce.	G/F	WHO, FAO, and OIE. Taking a Multisectoral, One Health Approach: A Tripartite Guide to Addressing Zoonotic Diseases in Countries. 2019: World Health Organization, Food and Agriculture Organization of the United Nations and the World Organisation for Animal Health.	FAO	OIE	WHO
	3.6a		One Health Workforce Project	To-date, the One Health Workforce project has developed One Health University Networks in Central and East Africa (OHCEA) and South East Asia (SEAOHUN) that are intended to develop and train the future workforce in One Health. Educational materials, including course modules, manuals and guides are available on the UMN website. Recently, the One Health Workforce – Next Generation was awarded to UC…	G&T	UMN. One Health Workforce. 2019; University of Minnesota College of Veterinary Medicine. ADD UCDavis when available	UMN
	3.7a	Create protocols and standard operating procedures	OIE Manual of Diagnostic Tests and Vaccines for Terrestrial Animals 2018	This OIE manual is specifically focused on building laboratory capacity around diagnostic tests and vaccines. It provides international standards for laboratories and vaccine production facilities, as well as guidelines for specific diseases of veterinary significance in international trade.	IM	OIE. Manual of Diagnostic Tests and Vaccines for Terrestrial Animals. World Organisation for Animal Health. 2018.	OIE Terrestrial Manual
	3.8a		Manual of Diagnostic Tests for Aquatic Animals 2016	This OIE manual is specifically focused on building laboratory capacity around diagnostic tests and vaccines. It provides a standardized approach for laboratory management and diagnosis of aquatic animal diseases and facilitate health certification for aquatic animals and their products.	IM	OIE. Manual of Diagnostic Tests for Aquatic Animals. World Organisation for Animal Health. 2016.	OIE Aquatic Manual

## Sheet: 3(b) - Planning (ZD)
	Table 3(b) - Zoonotic Disease-Specific Planning Resources
	Column descriptions: GOHF Activity: Corresponds to each activity outlined in the Generalized One Health Framework (GOHF), under Planning (Step 3; Figure 1). Resource: An available document, website or tool that may assist in developing capacity to conduct the GOHF activity. Resource Description: A short overview of the resource. Type: A categorization of the type of resource, where EgD = Example …
	#	GOHF Activity	Zoonotic Disease	Resource	Resource Description	Type	Citations	Online Links
	3.1b	Develop plans for priority zoonotic diseases	Anthrax	Anthrax in Humans and Animals, 4th Edition	This guidance document outlines anthrax etiology, ecology and pathology, suggested treatment and control measures, and provides surveillance outlines for both public and animal health. Annexes include information on suggested laboratory diagnostics, vaccines, and environmental sampling procedures.	G/F	WHO. Anthrax in Humans and Animals, 4th Edition. World Health Organization. 2008.	WHO Anthrax
	3.2b		Anthrax	Guidelines on surveillance and control of anthrax in humans and animals	This guidance document outlines anthrax etiology, epidemiology, treatment, control and surveillance in both people and animals. Appendix VII (Model Country Program) includes templates and ideal targets in the areas of surveillance, reporting, disinfection, vaccination and education in order to assist national health authorities in defining their challenges and developing action plans.	G/F	WHO. Guidelines for the surveillance and control of anthrax in humans and animals. World Health Organization. 2019.	WHO Anthrax Guidelines
	3.3b		Brucellosis	A Stepwise Approach for the Progressive Control of Brucellosis in Livestock and Humans (SAPCB)	The SAPCB is a guidance document that uses FAO's stepwise control approach to define stages that assist countries in eliminating brucellosis in livestock through a set of recommended actions and activities. It includes activities in both livestock and people and is intended to be paired with the Stepwise Tool for Brucellosis Elimination (STEB; Table 2b, 2.3b ).	G/F	In pilot stage; available soon	Not available online
	3.4b		Brucellosis	Brucellosis in Humans and Animals	These brucellosis guidelines provide information on clinical manifestation, epidemiology, diagnosis, treatment, prevention, control, surveillance, and multisectoral, One Health collaboration.	G/F	WHO. Brucellosis in humans and animals. World Health Organization. 2006.	WHO Brucellosis
	3.5b		Rabies	Rabies Practical Workplan	The PWARE was added to the SARE tool (see Table 2b, 2.4b) to assist users in developing long-term rabies control plans. The tool uses output from the SARE to identify activities that need to be conducted, and guides users through establishing timelines, responsibilities, and specific program goals. The PWARE is a fully customizable monitoring and evaluation (M&E) tool that is automatically genera…	G&T	GARC. The Blueprint and Stepwise Approach towards Rabies Elimination. 2019; Global Alliance for Rabies Control.	GARC SARE
	3.6b		Rabies	Blueprint for Canine Rabies Prevention and Control	This online resource =was developed by global rabies experts to provide guidance on how to prevent human rabies cases through control and elimination of rabies from dog populations. It isintended to be paired with the Stepwise Approach to Rabies Elimination (SARE; Table 2b, 2.4b) tool.	G/F	Lembo, T. and PRP, The blueprint for rabies prevention and control: a novel operational toolkit for rabies elimination. PLoS Neglected Tropical Diseases, 2012. 6(2): p. e1388-e1388. GARC. The Blueprint and Stepwise Approach towards Rabies Elimination. 2019; Global Alliance for Rabies Control. PRP. Blueprint for Rabies Prevention and Control Version 4. 2017; Partners for Rabies Prevention.	GARC SARE	PRP Blueprint
	3.7b		Viral Hemorrhagic Fevers	2011 National Notifiable Diseases Surveillance System (NNDSS) Viral Hemorrhagic Fever (VHF) Case Definition	CDC’s case definition for Viral Hemorrhagic Fever are used to define a disease for public health surveillance. Viruses included in this case definition are Crimean-Congo hemorrhagic fever, Ebola, Lassa, Lujo, Marburg, and New World arenaviruses.	EgD	CDC. Viral Hemorrhagic Fever (VHF) 2011 Case Definition. 2019; U.S. Centers for Disease Control and Prevention.	CDC VHF
	3.8b		Viral Hemorrhagic Fevers (Ebola and Marburg)	Ebola and Marburg virus disease epidemics: preparedness, alert, control and evaluation	This guidance document is focused specifically on building surveillance, outbreak, and prevention and control capacity. It provides recommendations for four phases of an Ebola/Marburg outbreak, namely preparedness, alert, outbreak, and evaluation.	G/F	WHO. Ebola Strategy- Ebola and Marburg virus disease epidemics: preparedness, alert, control and evaluation. World Health Organization. 2014.	WHO Ebola Strategy
	3.9b		Rabies	Mass Dog Vaccination Planning Tool	This excel-based tool is focused specifically on building prevention and control capacity by assisting with planning logistical and financial aspects of a mass dog rabies vaccination campaign. The tool allows the user to input campaign-specific factors related to dog populations, vaccine strategies, and vaccinator experience. Output includes the anticipated cost of the campaign, the expected popu…		[INS when pub] Soon to be published in Epi Infection	Not available online
	3.10b		Zoonotic Influenza	Evaluation and Capacity Review Tools	This CDC webpage hosts tools that can be used to assess planning, preparedness, and laboratory capacity for novel influenza viruses.	G&T	CDC. Evaluation and Capacity Review Tools. 2012; U.S. Centers for Disease Control and Prevention.	CDC Flu Evaluation
	3.11b		Zoonotic Influenza	CDC Federal Resources for Planning	This CDC webpage hosts a number of resources that can be used as example documents or templates, including a national strategy for pandemic influenza, vaccine and medical countermeasures, communications plans, and surveillance and laboratory resources.	EgD	CDC. Federal Resources for Planning. 2016; U.S. Centers for Disease Control and Prevention.	CDC Flu Planning
	3.12b		Zoonotic Influenza	CDC Pandemic Influenza Page	This CDC webpage hosts links to a number of useful web pages and documents that can assist in pandemic preparedness for zoonotic influenza outbreaks, including Severity Assessment Frameworks, Global, Federal, and State Planning Resources, and economic tools.	G&T	CDC. Pandemic Influenza. 2019; U.S. Centers for Disease Control and Prevention.	CDC Pandemic Influenza
	3.13b		Zoonotic Influenza	WHO Pandemic Influenza Risk Management	This WHO guideline is intended to inform and harmonize national pandemic preparedness and response with international activities. The guidelines highlight a risk-based approach to prioritize national activities in pandemic planning.	G/F	WHO. Pandemic Influenza Risk Management Guidance. World Health Organization. 2017.	WHO Pandemic Influenza Guidance
	3.14b		Zoonotic Influenza	WHO Pandemic Preparedness	This WHO webpage hosts a number of different guidance documents and tools to assist countries in planning for pandemic influenza.	G&T	WHO. Influenza- Public health preparedness. World Health Organization. 2019.	WHO Pandemic Preparedness
	3.15b		Zoonotic Influenza	WHO checklist for influenza pandemic preparedness planning	WHO expert guidance on activities required to adequately plan for a pandemic influenza virus outbreak. Guidance includes essential and desirable activities in a checklist format.	G/F	WHO. WHO checklist for influenza pandemic preparedness planning. World Health Organization. 2005.	WHO Influenza Checklist
	3.16b	Create protocols and standard operating procedures	Anthrax	Australian Veterinary Emergency Plan (AUSVETPLAN)	Guidance document from Animal Health Australia (AHA) that provides information on anthrax, including: relevant risk factors, treatment and outbreak management; policy and guidelines for agencies and organizations involved in outbreak response; quarantine and movement control; and surveillance and proof of freedom of disease.	EgD	AHA. AUSVETPLAN Manuals and Documents. 2019; Animal Health Australia. AHA. AUSVETPLAN Disease Strategy Anthrax Version 4.1. 2017; Animal Health Australia.	AUSVETPLAN Manuals
	3.17b		Anthrax	OIE Manual of Diagnostic Tests and Vaccines for Terrestrial Animals 2018 CH. 3.1.1	(See 3.8a for general description of the OIE Manual of Diagnostic Tests and Vaccines for Terrestrial Animals) Chapter 3.1.1 chapter describes specific OIE-recommended laboratory diagnostic tests and vaccines for anthrax, including identifying the agent, serological tests, and requirements for vaccines.	IM	OIE. Manual of Diagnostic Tests and Vaccines for Terrestrial Animals. World Organisation for Animal Health. 2018.	OIE Terrestrial Manual
	3.18b		Brucellosis	Brucellosis Reference Guide: Exposures, Testing and Prevention	CDC guidelines that outline case definition, reporting, diagnostics and treatment of brucellosis. Also describes routes of exposure from both humans and animals and prevention measures.	EgD	CDC. Brucellosis Reference Guide: Exposures, Testing, and Prevention. 2017; U.S. Centers for Disease Control and Prevention.	CDC Brucellosis Reference Guide
	3.19b		Brucellosis	OIE Manual of Diagnostic Tests and Vaccines for Terrestrial Animals 2018, CH 3.1.4	(See 3.8a for general description of the OIE Manual of Diagnostic Tests and Vaccines for Terrestrial Animals) Chapter 3.1.4 describes specific OIE-recommended laboratory diagnostic tests and vaccines for brucellosis, including identifying the agent, serological tests, and requirements for vaccines.	IM	OIE. Manual of Diagnostic Tests and Vaccines for Terrestrial Animals. World Organisation for Animal Health. 2018	OIE Terrestrial Manual
	3.20b		Rabies	Laboratory techniques in rabies, fifth edition	This WHO document describes best-practices and laboratory methods for rabies detection under operating conditions that vary from basic to advanced. Also includes prescriptive laboratory protocols.	IM	WHO. Laboratory techniques in rabies, Fifth edition. Vol. 2. 2019. World Health Organization.	WHO Rabies Lab Techniques
	3.21b		Rabies	OIE Manual of Diagnostic Tests and Vaccines for Terrestrial Animals 2018 CH 3.1.7	(See 3.8a for general description of the OIE Manual of Diagnostic Tests and Vaccines for Terrestrial Animals) Chapter 3.1.17 describes specific OIE-recommended laboratory diagnostic tests and vaccines for rabies and other lyssaviruses, including identifying the agent, serological tests, and requirements for vaccines.	G/F	OIE. Manual of Diagnostic Tests and Vaccines for Terrestrial Animals. World Organisation for Animal Health. 2018.	OIE Terrestrial Manual
	3.22b		Rabies	WHO Expert Consultation on Rabies, third report	This document provides WHO expert recommendations on laboratory diagnostic techniques in both humans and animals, human rabies patient management, human rabies vaccine procedures and requirements, and prevention and control strategies in humans, dogs and wildlife.	G/F	WHO. WHO Expert Consultation on Rabies, Third report. World Health Organization. 2018.	WHO Rabies
	3.23b		Rift Valley Fever	OIE Manual of Diagnostic Tests and Vaccines for Terrestrial Animals 2018 CH. 3.1.18	(See 3.8a for general description of the OIE Manual of Diagnostic Tests and Vaccines for Terrestrial Animals) Chapter 3.1.18 chapter describes specific OIE-recommended laboratory diagnostic tests and vaccines for Rift Valley Fever, including identifying the agent, serological tests, and requirements for vaccines.	IM	OIE. Manual of Diagnostic Tests and Vaccines for Terrestrial Animals. World Organisation for Animal Health. 2018.	OIE Terrestrial Manual
	3.24b		Zoonotic Avian Influenza	OIE Manual of Diagnostic Tests and Vaccines for Terrestrial Animals 2018 CH. 3.3.4	(See 3.8a for general description of the OIE Manual of Diagnostic Tests and Vaccines for Terrestrial Animals) Chapter 3.3.4 describes specific OIE-recommended laboratory diagnostic tests and vaccines for avian influenza, including identifying the agent, serological tests, and requirements for vaccines.	IM	OIE. Manual of Diagnostic Tests and Vaccines for Terrestrial Animals. 2018.	OIE Terrestrial Manual
	3.25b		Zoonotic Swine Influenza	OIE Manual of Diagnostic Tests and Vaccines for Terrestrial Animals 2018 CH. 3.8.7	(See 3.8a for general description of the OIE Manual of Diagnostic Tests and Vaccines for Terrestrial Animals) Chapter 3.8.7 describes specific OIE-recommended laboratory diagnostic tests and vaccines for swine influenza, including identifying the agent, serological tests, and requirements for vaccines.	IM	OIE. Influenza A Virus of Swine, in OIE Terrestrial Manual 2018. World Organisation for Animal Health. 2018.	OIE Swine Influenza
	3.26b		Zoonotic Influenza	Guidance for Surveillance During an Influenza Pandemic	This WHO document provides recommendations specific to the public health sector for standardized and coordinated surveillance and information sharing during an influenza pandemic.	G/F	WHO. WHO guidance for surveillance during an influenza pandemic, 2017 update. World Health Organization. 2017.	WHO Influenza Guidance
	3.27b		Viral Hemorrhagic Fevers	Clinical Management of Patients with Viral Haemorrhagic Fever	Guidelines for front-line health workers on managing suspected or confirmed viral hemorrhagic fever patients, including infection prevention and control.	G/F	WHO. Clinical management of patients with viral haemorrhagic fever- A pocket guide for the front-line health worker. World Health Organization. 2016.	WHO Clinical Management
	3.28b		Viral Hemorrhagic Fevers (Ebola)	Guidance for Pets Exposed to Ebola Virus Disease through Human Contact	These CDC guidelines and published scientific manuscript provide recommendations for monitoring and quarantine of pets or other companion animals potentially exposed to Ebola virus through contact with infected humans.	EgD	Spengler, J.R., et al., Management of a pet dog after exposure to a human patient with Ebola virus disease. Journal of the American Veterinary Medical Association, 2015. 247(5): p. 531-538. AVMA Ebola Companion Animal Response Plan Working Group. Interim Guidance for Dog or Cat Quarantine after Exposure to a Human with Confirmed Ebola Virus Disease. American Veterinary Medical Association. 2014. …	Dog & Cat Quarantine	Public Health Guidance
	3.29b		Zoonotic Influenza	OpenWHO	WHO now hosts an interactive web platform that offers online courses to improve workforce response during health emergencies. Several courses focus on pandemic influenza.	G/F	WHO. Welcome to OpenWHO. World Health Organization. 2019.	OpenWHO
	3.30b		Zoonotic Influenza	ECDC Country preparedness plans on zoonotic influenza	The ECDC hosts links to preparedness and response plans from a number of European Union member states that can be used as examples for developing influenza preparedness plans.	EgD	ECDC. Country preparedness plans on zoonotic influenza. 2019; European Centre for Disease Prevention and Control.	ECDC Influenza

## Sheet: 4(a) - Implementation (General)
	Table 4(a) - General Implementation Resources
	Column descriptions: GOHF Activity: Corresponds to each activity outlined in the Generalized One Health Framework (GOHF), under Implementation (Step 4; Figure 1). Resource: An available document, website or tool that may assist in developing capacity to conduct the GOHF activity. Resource Description: A short overview of the resource. Type: A categorization of the type of resource, where EgD = Ex…
	#	GOHF Activity	Resource	Resource Description	Type	Citations	Online Links
	4.1a	Implement One Health strategic plan	N/A	Additional resources are needed for implementing and systematizing One Health strategic plans.	NA	N/A	N/A
	4.2a	Solicit, acquire and allocate funding	Health Security Financing Assessment Tool	This World Bank tool maps funding sources, flow of spending, funding levels, and funding recipients in health security plans. Complements the JEE and PVS Pathway, and partitions funding into prevention and detection, and recovery and response allocations. Is not intended for a funding gap analysis.	T/TK	WBG. Operational Framework for Strengthening Human, Animal, and Environmental Public Health Systems at their Interface. 2018; World Bank Group.	Not available online
	4.3a	Implement plans, protocols and procedures	Electronic Integrated Disease Surveillance System (EIDSS)	Supported by the Defense Threat Reduction Agency, EIDSS is an information system and surveillance platform that uses a multisectoral, One Health approach by integrating surveillance information across sectors and levels of government. It is fully customizable based on country needs, can be used on a desktop, mobile device, or web platform, and is Open Source.	T/TK	Wahl, T.G., et al., Electronic integrated disease surveillance system and pathogen asset control system. Onderstepoort Journal of Veterinary Research, 2012. 79(2): p. 38-42.	N/A
	4.4a		Tripartite Zoonoses Guide – Joint Risk Assessment (JRA) Operational Tool	The JRA is focused specifically on building preparedness capacity. It can be used by the relevant sectors in countries wishing to conduct a qualitative joint risk assessment for national priority zoonoses, ongoing zoonotic disease event, or other health threats at the human-animal-environment interface.	G&T	WHO, FAO, and OIE. Conducting National Joint Risk Assessment, A Tripartite Operational Tool. 2018, World Health Organization, Food and Agriculture Organization of the United Nations, World Organisation for Animal Health.	Currently available to countries wishing to conduct pilots; see web flyer for contact information.

## Sheet: 4(b)-Implementation (ZD)
	Table 4(b) - Zoonotic Disease-Specific Implementation Resources
	Column descriptions: GOHF Activity: Corresponds to each activity outlined in the Generalized One Health Framework (GOHF), under Implementation (Step 4; Figure 1). Resource: An available document, website or tool that may assist in developing capacity to conduct the GOHF activity. Resource Description: A short overview of the resource. Type: A categorization of the type of resource, where EgD = Ex…
	#	GOHF Activity	Zoonotic Disease	Resource	Resource Description	Type	Citations	Online Links
	4.1b	Implement plans, protocols and procedures	Rabies	Rabies App	This app specifically focuses on buidling surveillance and prevention and control capacity. It is available for tablets and mobile phones, and is intended to facilitate rapid, consolidated data gathering and sharing at the field-level for dog vaccination campaigns and rabies surveillance.	T/TK	MR. Mission Rabies- Rabies App. 2019; Mission Rabies.	Mission Rabies App

## Sheet: 5(a)-Monitoring&Eval. (General)
	Table 5(a) - General Monitoring and Evaluation Resources
	Column descriptions: GOHF Activity: Corresponds to each activity outlined in the Generalized One Health Framework (GOHF), under Monitoring and Evaluation (Step 5; Figure 1). Resource: An available document, website or tool that may assist in developing capacity to conduct the GOHF activity. Resource Description: A short overview of the resource. Type: A categorization of the type of resource, whe…
	#	GOHF Activity	Resource	Resource Description	Type	Citations and Online Links	Online Links
	5.1a	Evaluate components of One Health systems	National Action Plans for Health Security (NAPHS)	[See table 3a, 3.1a for description of the NAPHS]	T/TK	WHO. National Action Plan for Health Security (NAPHS). World Health Organization. 2019.	WHO NAPHS
	5.2a		States Parties Annual Report (SPAR) tool	This WHO tool assists Sates Parties in fulfilling their obligations under the International Health Regulations (IHR), which mandate annual reporting and review to the Health Assembly on IHR implementation. While reporting is mandatory by States Parties, the use of this tool is voluntary.	T/TK	WHO. State Party self-assessment annual reporting tool International Health Regulations (2005). World Health Organization.2018.	WHO SPAR
	5.3a		The One Health Assessment for Planning and Performance (OH-APP)	This online self-assessment framework can be used to evaluate the capacity and performance of multisectoral, One Health coordinating mechanisms, and is intended to be revisited annually.	T/TK	USAID. Welcome to the One Health App. 2019; United States Agency for International Development.	One Health App
	5.4a	Evaluate successes, challenges, scope and scale of programs	WHO Resource Mapping and Impact Analysis (REMAP)	This is a spreadsheet-based tool that allows countries to map and develop overviews of both available and potential resources for building health security capacity. REMAP can support decision-making by showing the landscape of available resources on a single platform, monitor progress as implementation continues, and assist in performing an impact analysis.	T/TK	WHO. Resource mapping and impact analysis on health security investment (REMAP). World Health Organization. 2019.	WHO REMAP
	5.5a		Network Evaluation for One Health (NEOH)	NEOH is an open and collaborative framework developed by experts to improve decision-making and quantitative evaluations of One Health activities. NEOH's framework can be used to evaluate One Health systems and zoonotic disease-specific programs, and assigns a "One Healthness" score.	G&T	NEOH. Network for Evaluation of One Health. 2019. Rüegg, S.R., B. Häsler, and J. Zinsstag, Integrated approaches to health: a handbook for the evaluation of One Health. 2018. Rüegg, S.R., et al., A Systems Approach to Evaluate One Health Initiatives. Frontiers in Veterinary Science, 2018. 5(23).	NEOH
	5.6a		After Action Review (AAR)	The AAR specifically focuses on building preparedness and response capacity by presenting a methodology for evaluating actions taken during emergency response to a public health event. It is based on a format of documenting differences in plans and implementation, analyzing successes and failures, and identifying actions to improve response.	T/TK	WHO. After Action Review. World Health Organization. 2019.	WHO AAR
	5.7a		Simulation Exercises and Manual (SimEx)	This WHO guidance and tool focuses on building preparedness and response capacity by assisting to plan and implement simulation exercises for public health emergencies. It is intended to test the functional and procedural capabilities of emergency response systems, thereby enhancing preparedness and response capacity before an emergency occurs.	G&T	WHO. WHO Simulation Exercise Manual.World Health Organization. 2017.	WHO Simulation Exercise Manual

## Sheet: 5(b) - Monitoring&Eval. (ZD)
	Table 5(b) - Zoonotic Disease-Specific Monitoring and Evaluation Resources
	Column descriptions: GOHF Activity: Corresponds to each activity outlined in the Generalized One Health Framework (GOHF), under Monitoring and Evaluation (Step 5; Figure 1). Resource: An available document, website or tool that may assist in developing capacity to conduct the GOHF activity. Resource Description: A short overview of the resource. Type: A categorization of the type of resource, whe…
	#	GOHF Activity	Zoonotic Disease	Resource	Resource Description	Type	Citations and Online Links	Online Links
	5.1b	Evaluate successes, challenges, scope and scale of programs	Zoonotic Influenza	National Inventory of Core Capabilities for Pandemic Influenza Preparedness and Response	CDC’s evaluation plan with 12 capabilities and corresponding indicators can be used to evaluate a country’s pandemic influenza preparedness plan and determine progress toward preparedness through time.	T/TK	CDC. Evaluation and Capacity Review Tools. 2012; U.S. Centers for Disease Control and Prevention.	CDC Evaluation Tools
	5.2b		Zoonotic Influenza	A practical guide for developing and conducting simulation exercise	This WHO document is intended to support countries in building preparedness and response capacity by developing and conducting simulation exercises that test and validate their national pandemic influenza preparedness plans.	G/F	WHO. A practical guide for developing and conducting simulation exercises to test and validate pandemic influenza preparedness plans. World Health Organization. 2018.	WHO Influenza Guide
	5.3b		Zoonotic Influenza	CDC Pandemic Modeling Tools	This tool apge can build preparedness and response capacity for zoonotic influenza at sub-national and local public health levels. Specifically, these resources simulate pandemic influenza outbreaks under different planning scenarios and can therefore assist with assessing the effectiveness of pandemic planning prior to an event occurring.	T/TK	CDC. CDC Pandemic Tools. 2016; U.S. Centers for Disease Control and Prevention.	CDC Pandemic Tools

[truncated: 1 more sheets: Abbreviations]
